# Supplementary material for: Absence of mouse 2B4 promotes NK cell–mediated killing of activated CD8+ T cells, leading to prolonged viral persistence and altered pathogenesis
Source: JCI journal article supplement (doi:10.1172/jci41264), 2010-05-03
Supplement: sd1 [file 1]

Waggoner Supplemental figure 1

H&E Day 12 p.i.

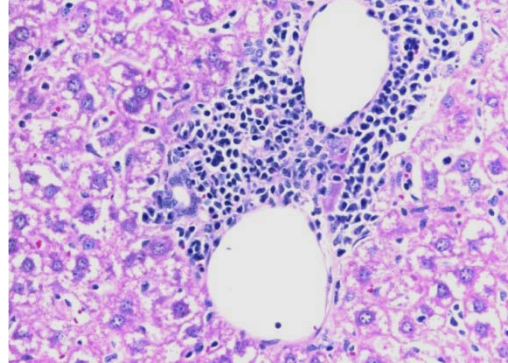

WT

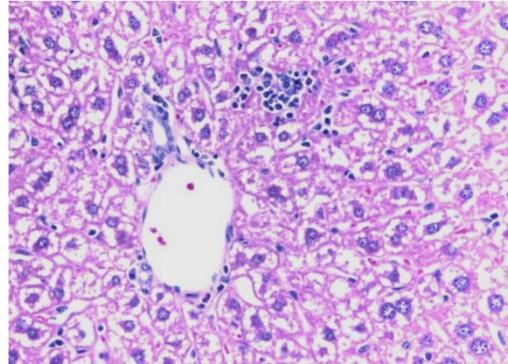

2B4 KO

Supplemental Figure 1. Reduced lymphocytic infiltration of liver demonstrated by H&E staining of formalin-fixed liver sections at day 12 after LCMV clone 13 infection ( $2 \times 10^6$  PFU i.v.).

## Waggoner Supplemental figure 2

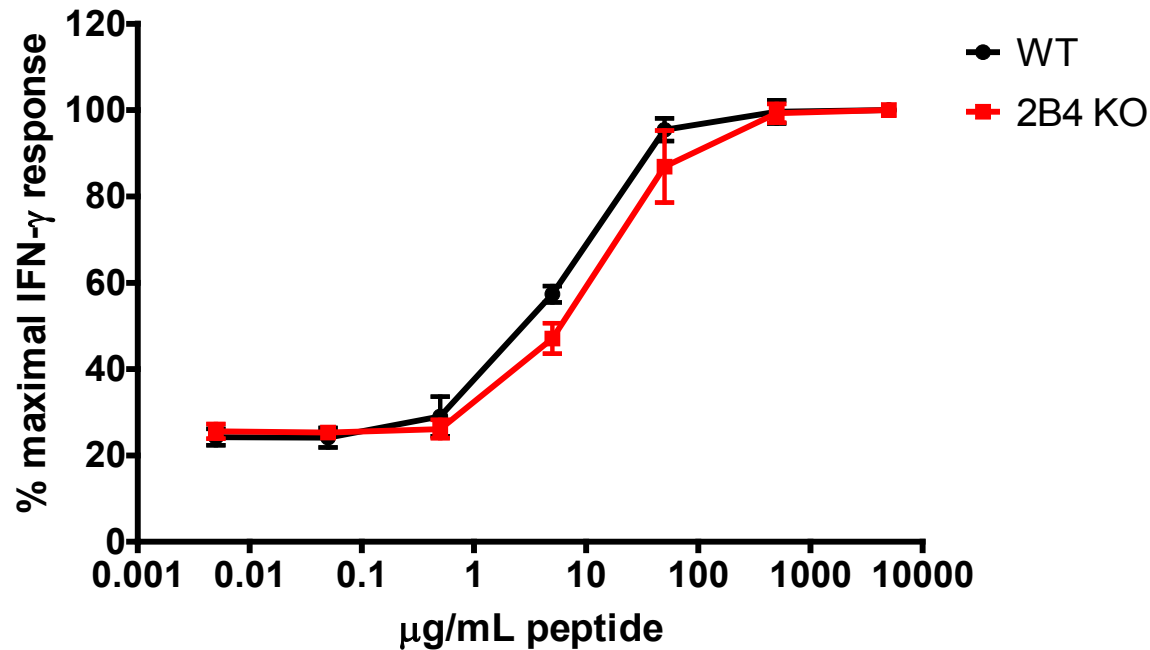

Supplemental Figure 2. Similar functional avidity of GP<sub>33-41</sub>-specific CD8 T cells in WT and 2B4 KO spleens at day 9 of LCMV clone 13 infection. Splenocytes were stimulated in vitro with varying concentrations of GP<sub>33-41</sub> peptide and stained intracellularly for expression of IFN- $\gamma$ . IFN- $\gamma$ + CD8 T cells are plotted as a proportion of the maximal response.

# Waggoner Supplemental Figure 3

Spleen, day 6 LCMV clone 13 infection

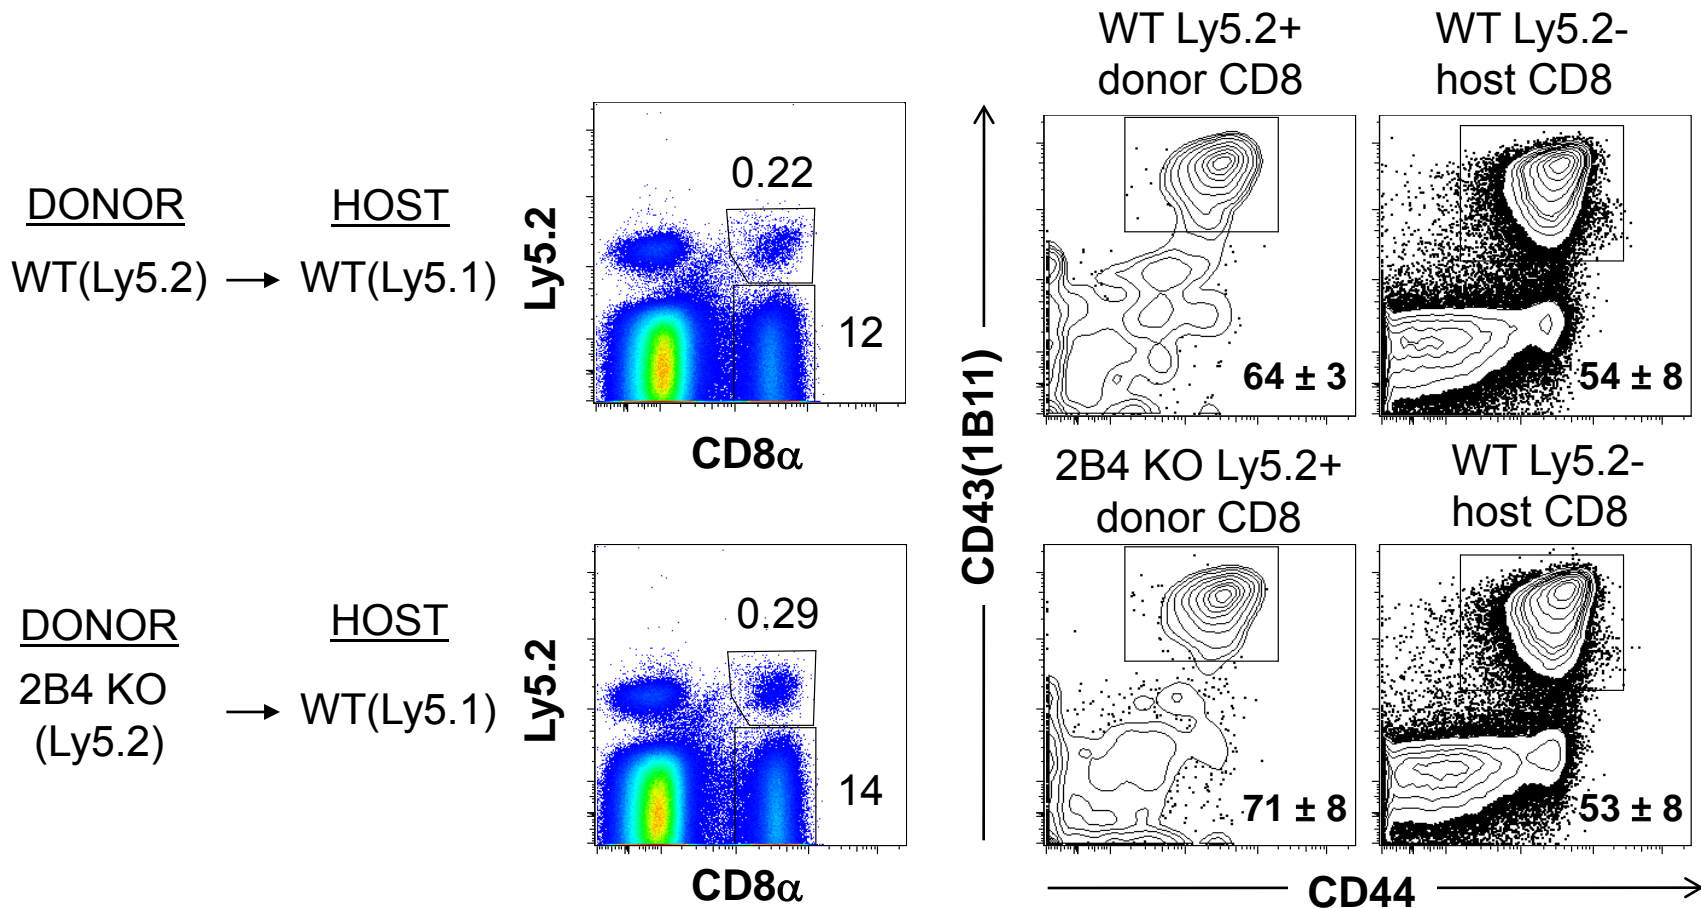

Supplemental Figure 3. Extrinsic role of 2B4 in regulating phenotype of CD8 T cells. Bulk splenocytes ( $4 \times 10^7$ ) from WT (Ly5.2) or 2B4 KO (Ly5.2) mice were transferred i.v. into WT congenic Ly5.1 mice. Recipient mice were infected with  $2 \times 10^6$  PFU LCMV clone 13 i.v. Phenotype of donor (Ly5.2) and host (Ly5.1) CD8 T cells was analyzed at day 6 p.i. Representative gating of donor (Ly5.2+) and host (Ly5.2-) CD8α+ T cells is shown in left panel. Expression of CD44 and CD43(1B11) on WT or KO donor (Ly5.2+) CD8 T cells as well as WT host (Ly5.2-) CD8 T cells at day 6 p.i. (n = 4) is shown in right panels. (WT vs 2B4 KO donor,  $P > 0.1$ ).

## Waggoner Supplemental figure 4

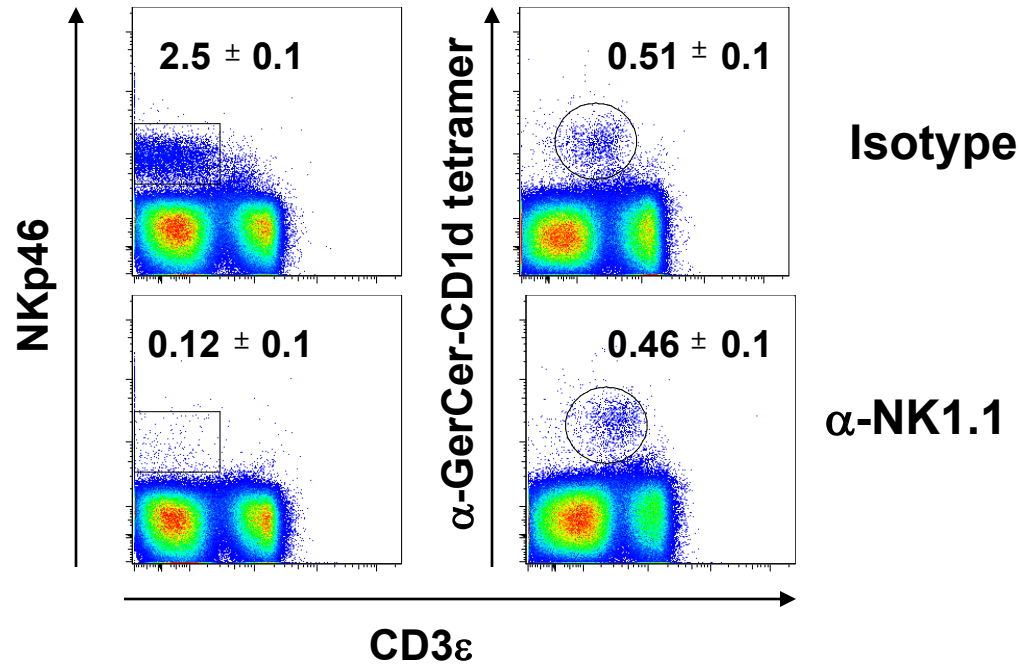

Supplemental Figure 4. A single intraperitoneal injection of 25  $\mu\text{g}$  anti-NK1.1 results in depletion of NKp46<sup>+</sup>CD3<sup>-</sup> NK cells without affecting numbers of NK T cells (CD3<sup>int</sup> CD1d-Tet<sup>+</sup>). Representative FACS plots of WT splenocytes one day after anti-NK1.1 or isotype IgG2a administration are shown.

# Waggoner Supplemental figure 5

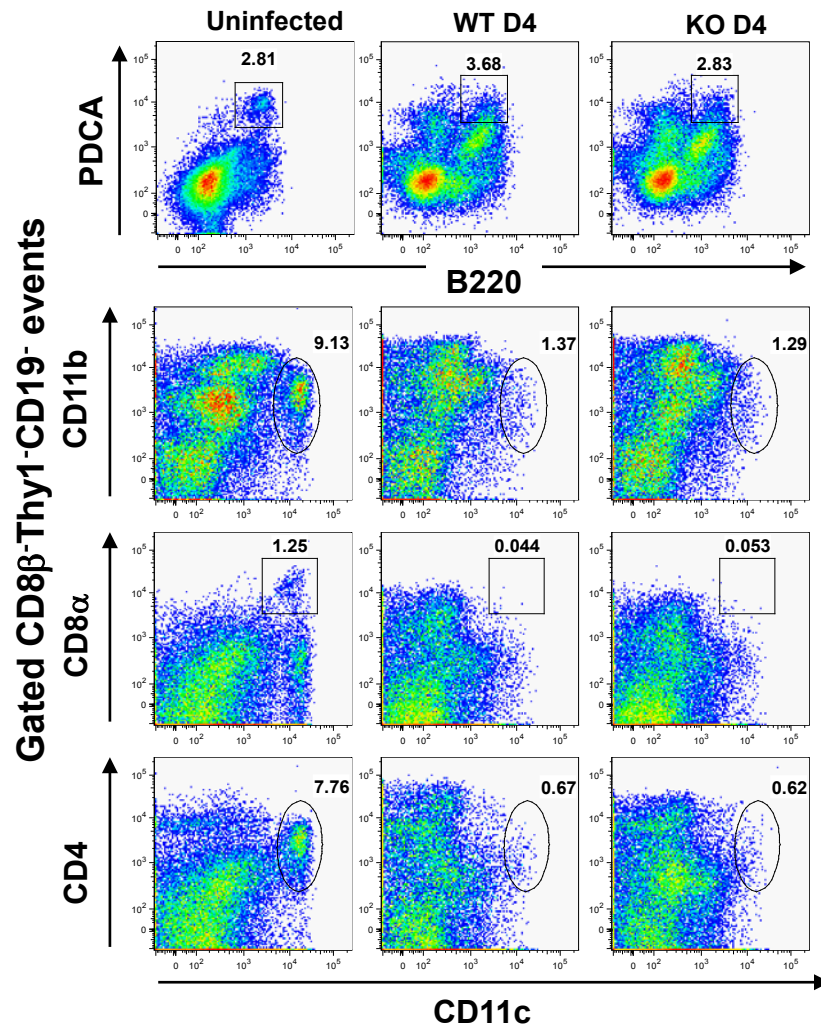

Supplemental Figure 5. Loss of DC populations in spleen of WT and KO mice at day 4 of LCMV clone 13 infection. Splenocytes were gated on CD8 $\beta$ -neg, Thy1.2-neg, and CD19-neg events. Representative stains for CD4<sup>+</sup> DC, CD8<sup>+</sup> DC, CD11b<sup>+</sup> DC, and plasmacytoid DC (PDCA<sup>+</sup> B220<sup>+</sup>) are shown.

## Waggoner Supplemental Figure 6

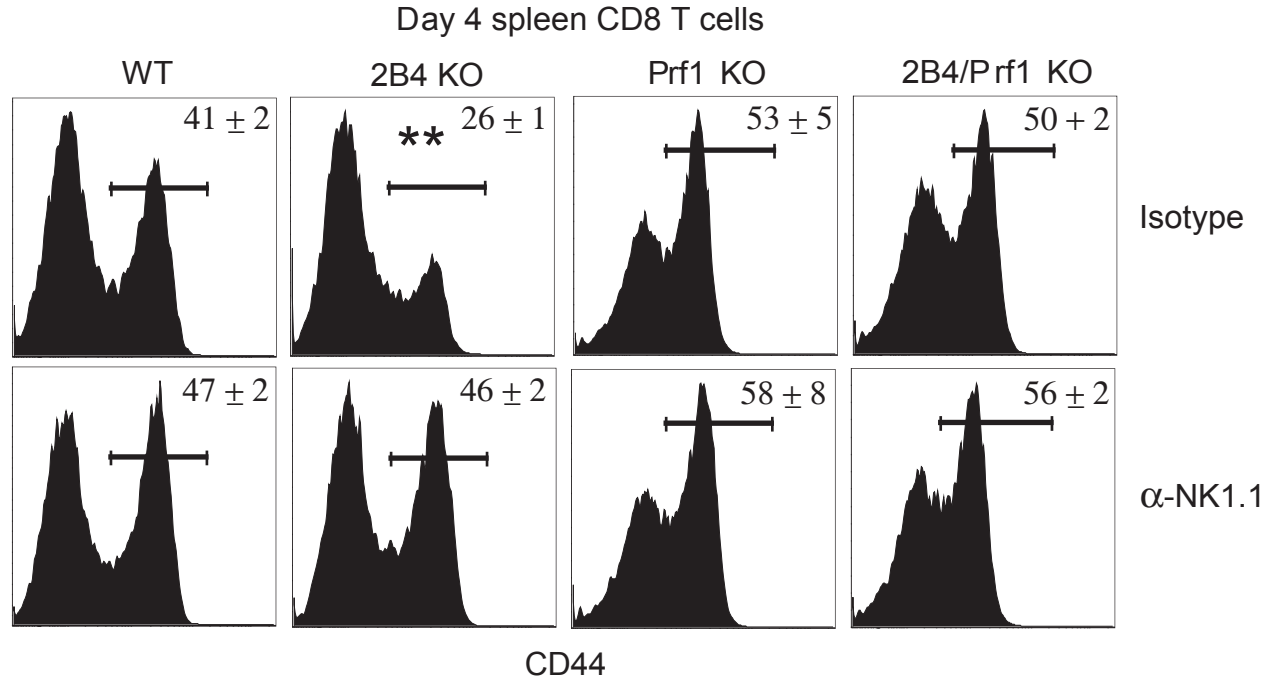

Supplemental Figure 6. NK cell- and perforin-dependent loss of CD44<sup>hi</sup> CD8 T cells during LCMV clone 13 infection of 2B4 KO mice. Representative histograms depict expression of CD44 by splenic CD8 T cells in WT, 2B4 KO, Prf1 KO, and 2B4/Prf1 KO mice at day 4 of LCMV clone 13 infection. Numbers are mean %CD44<sup>hi</sup> (+ SD) for similarly treated mice (n = 4) in the experiment. \*\*P < 0.01 (two-tailed unpaired Student's T-test).
